# Supplementary material
Source: publisher figshare collection journal article supplement (https://tandf.figshare.com/ndownloader/files/22851611)
Supplement: Supplementary file 1 [file 22851611]

# OHSU BCI Sensory/Cognitive/Communication Screen, Revised

## Part I: Pre-screen

To be completed with a loved one or paid caregiver who knows the participant well.

1. Participant ID #: \_\_\_\_\_ 2. Date: \_\_\_\_/\_\_\_\_/\_\_\_\_  
MM DD YYYY 3. Researcher initials: \_\_\_\_\_

4. Pre-screen respondent name: \_\_\_\_\_

5. Length of relationship with participant: \_\_\_\_\_ years

6. Respondent relationship to participant:

- ☐1 Spouse/partner
- ☐2 Child
- ☐3 Parent
- ☐4 Sibling
- ☐5 Other family member
- ☐6 Friend
- ☐7 Paid caregiver

7. Can participant tolerate 1-2 hour sessions involving computer tasks? (If NO, participant is ineligible.)

- ☐1 Yes
- ☐2 No

8. Best day of week/time of day to visit? \_\_\_\_\_  
\_\_\_\_\_

### Pre-screen: Communication

9. How does participant communicate? Include any and all communication methods used. \_\_\_\_\_  
\_\_\_\_\_  
\_\_\_\_\_

10. Does participant have reliable signals for "yes" and "no"?

- ☐1 Yes
- ☐2 No

11. How does participant signal "yes"? (List/describe all signals): \_\_\_\_\_

12. How does participant signal "no"? (List/describe all signals): \_\_\_\_\_

13. Do you have any concerns about participant's ability to understand spoken or written words?

- ☐1 Yes\* If yes, describe: \_\_\_\_\_
  - ☐2 No
- \_\_\_\_\_  
\_\_\_\_\_

**Pre-screen: Motor**

**14. In what position would participant be most comfortable or have the best motor response for a one hour visit?**

---

---

**15. Does participant need frequent repositioning?**

- ☐1 Yes\* If yes, describe needs:  
☐2 No

---

---

**16. Can participant remain in one position for 10 minutes?**

- ☐1 Yes  
☐2 No

**17. Can participant move his/her head?**

- ☐1 Yes  
☐2 No

**18. Can participant keep his/her head still?**

- ☐1 Yes  
☐2 No

**19. How is participant's head supported (headrest, pillows, etc.)?** \_\_\_\_\_

---

**20. Please describe any concerns you may have about positioning or movement.** \_\_\_\_\_

---

**Pre-screen: Vision**

**21. Date of last eye exam:** \_\_\_\_/\_\_\_\_/\_\_\_\_ ☐ Unknown ☐ No recent exam  
MM YYYY

**22. Clinic name and contact info:** \_\_\_\_\_ ☐ Unknown/not provided

**23. Does participant wear glasses?**

☐1 Yes\* If yes: How old are current glasses? \_\_\_\_\_ years  
☐2 No How often are glasses worn? \_\_\_\_\_

**24. Does participant currently take any eye medications?**

☐1 Yes\* If yes, please list: \_\_\_\_\_  
☐2 No \_\_\_\_\_

**25. Does participant have a history of any of the following?**

|                                     |                                 |                               |                                    |                                               |
|-------------------------------------|---------------------------------|-------------------------------|------------------------------------|-----------------------------------------------|
| Cataracts                           | <input type="checkbox"/> 1 Yes* | <input type="checkbox"/> 2 No | <input type="checkbox"/> 3 Unknown | If yes, date of dx: ____/____/____<br>MM YYYY |
| Macular degeneration                | <input type="checkbox"/> 1 Yes* | <input type="checkbox"/> 2 No | <input type="checkbox"/> 3 Unknown | If yes, date of dx: ____/____/____<br>MM YYYY |
| Glaucoma                            | <input type="checkbox"/> 1 Yes* | <input type="checkbox"/> 2 No | <input type="checkbox"/> 3 Unknown | If yes, date of dx: ____/____/____<br>MM YYYY |
| Dry eyes/keratoconjunctivitis sicca | <input type="checkbox"/> 1 Yes* | <input type="checkbox"/> 2 No | <input type="checkbox"/> 3 Unknown | If yes, date of dx: ____/____/____<br>MM YYYY |
| Diabetes/diabetic retinopathy       | <input type="checkbox"/> 1 Yes* | <input type="checkbox"/> 2 No | <input type="checkbox"/> 3 Unknown | If yes, date of dx: ____/____/____<br>MM YYYY |
| Visual field cut                    | <input type="checkbox"/> 1 Yes* | <input type="checkbox"/> 2 No | <input type="checkbox"/> 3 Unknown | If yes, date of dx: ____/____/____<br>MM YYYY |
| Light sensitivity                   | <input type="checkbox"/> 1 Yes* | <input type="checkbox"/> 2 No | <input type="checkbox"/> 3 Unknown | If yes, date of dx: ____/____/____<br>MM YYYY |
| Color blindness                     | <input type="checkbox"/> 1 Yes* | <input type="checkbox"/> 2 No | <input type="checkbox"/> 3 Unknown | If yes, date of dx: ____/____/____<br>MM YYYY |
| Cranial nerve injury                | <input type="checkbox"/> 1 Yes* | <input type="checkbox"/> 2 No | <input type="checkbox"/> 3 Unknown | If yes, date of dx: ____/____/____<br>MM YYYY |
| Lazy eye                            | <input type="checkbox"/> 1 Yes* | <input type="checkbox"/> 2 No | <input type="checkbox"/> 3 Unknown | If yes, date of dx: ____/____/____<br>MM YYYY |

**26. Do vision problems interfere with any functional activities (e.g. watching TV, looking at a computer monitor)?**

☐1 Yes\* If yes, explain: \_\_\_\_\_  
☐2 No \_\_\_\_\_  
☐3 Unknown \_\_\_\_\_

**Pre-screen: Hearing****27. Does participant have hearing loss?**

- ☐1 Yes  
☐2 No  
☐3 Unknown

**28. Does participant wear hearing aids?**

- ☐1 Yes\*      If yes: Which ear(s)?      ☐1 Left      ☐2 Right      ☐3 Both  
☐2 No      How often? \_\_\_\_\_

**29. Does participant seem to have any difficulty hearing normal conversation in a quiet room?**

- ☐1 Yes  
☐2 No  
☐3 Unknown

**Pre-screen: Cognition****30. Do you have concerns about participant's \_\_\_\_\_?**

- |                         |                                 |                               |                                    |                                      |
|-------------------------|---------------------------------|-------------------------------|------------------------------------|--------------------------------------|
| Attention               | <input type="checkbox"/> 1 Yes* | <input type="checkbox"/> 2 No | <input type="checkbox"/> 3 Unknown | If yes, why? _____<br>_____<br>_____ |
| Memory                  | <input type="checkbox"/> 1 Yes* | <input type="checkbox"/> 2 No | <input type="checkbox"/> 3 Unknown | If yes, why? _____<br>_____<br>_____ |
| Personality changes     | <input type="checkbox"/> 1 Yes* | <input type="checkbox"/> 2 No | <input type="checkbox"/> 3 Unknown | If yes, why? _____<br>_____<br>_____ |
| Other cognitive changes | <input type="checkbox"/> 1 Yes* | <input type="checkbox"/> 2 No | <input type="checkbox"/> 3 Unknown | If yes, why? _____<br>_____<br>_____ |

**Screening Visit Instructions**

"We need to know if [participant] is taking medications that may affect his/her brain signals. Taking these medications will not exclude him/her from the study, but we do need to know about them. Please have a current medication list available for us to look at during our first visit."

"You have received/will receive a copy of the informed consent form for this study. Please read through it with the participant before our first visit. We will review it together at that time. You, or another person who knows the participant well, must sign the form as his/her authorized research representative."

## Part II: Hearing, Auditory Comprehension, & Informed Consent

To be completed before participant gives consent for study involvement. First, ask participant to demonstrate his/her signals for “yes” and “no” and describe below.

31. Date: \_\_\_\_/\_\_\_\_/\_\_\_\_  
MM DD YYYY

32. Researcher initials: \_\_\_\_\_

33. Signal for “yes”: \_\_\_\_\_

34. Signal for “no”: \_\_\_\_\_

35. Signal for taking a break: \_\_\_\_\_

### Hearing

#### 36. Hearing screening:

- ☐1 Pass (responds to all three frequencies in both ears)  
☐2 Fail

All tones are to be presented at 25 dB. Vary pause times between tones.

“I am going to play a series of tones. Please give me your ‘yes’ signal any time you hear a tone.”

|           | 1000 Hz                                                                | 2000 Hz                                                                | 4000 Hz                                                                |
|-----------|------------------------------------------------------------------------|------------------------------------------------------------------------|------------------------------------------------------------------------|
| Right ear | <input type="checkbox"/> Response <input type="checkbox"/> No response | <input type="checkbox"/> Response <input type="checkbox"/> No response | <input type="checkbox"/> Response <input type="checkbox"/> No response |
| Left ear  | <input type="checkbox"/> Response <input type="checkbox"/> No response | <input type="checkbox"/> Response <input type="checkbox"/> No response | <input type="checkbox"/> Response <input type="checkbox"/> No response |

### Communication: Auditory Comprehension

#### 37. CRS-R: Visually Based Situational Orientation: \_\_\_\_/6

“Please watch what I am doing and answer my questions.”

|                                                         |   |                                                                     |
|---------------------------------------------------------|---|---------------------------------------------------------------------|
| 1. Am I touching my ear right now? (do not touch ear)   | N | <input type="checkbox"/> Correct <input type="checkbox"/> Incorrect |
| 2. Am I touching my nose right now? (touch nose)        | Y | <input type="checkbox"/> Correct <input type="checkbox"/> Incorrect |
| 3. Am I touching my nose right now? (touch nose)        | Y | <input type="checkbox"/> Correct <input type="checkbox"/> Incorrect |
| 4. Am I touching my ear right now? (do not touch ear)   | N | <input type="checkbox"/> Correct <input type="checkbox"/> Incorrect |
| 5. Am I touching my nose right now? (do not touch nose) | N | <input type="checkbox"/> Correct <input type="checkbox"/> Incorrect |
| 6. Am I touching my ear right now? (touch ear)          | Y | <input type="checkbox"/> Correct <input type="checkbox"/> Incorrect |

**38. WAB-R: Auditory Verbal Comprehension, Yes/No Questions:** \_\_\_\_/10

"I am going ask you some questions. Please respond yes or no."

|                                               |   |                                  |                                    |
|-----------------------------------------------|---|----------------------------------|------------------------------------|
| 1. Is your name Brown? (NO should be correct) | N | <input type="checkbox"/> Correct | <input type="checkbox"/> Incorrect |
| 2. Is your name [real name]?                  | Y | <input type="checkbox"/> Correct | <input type="checkbox"/> Incorrect |
| 3. Is this a hotel?                           | N | <input type="checkbox"/> Correct | <input type="checkbox"/> Incorrect |
| 4. Is this your room?                         | Y | <input type="checkbox"/> Correct | <input type="checkbox"/> Incorrect |
| 5. Are you on a roller coaster?               | N | <input type="checkbox"/> Correct | <input type="checkbox"/> Incorrect |
| 6. Will paper burn in a fire?                 | Y | <input type="checkbox"/> Correct | <input type="checkbox"/> Incorrect |
| 7. Does March come before June?               | Y | <input type="checkbox"/> Correct | <input type="checkbox"/> Incorrect |
| 8. Do you eat a banana before you peel it?    | N | <input type="checkbox"/> Correct | <input type="checkbox"/> Incorrect |
| 9. Is a horse larger than a dog?              | Y | <input type="checkbox"/> Correct | <input type="checkbox"/> Incorrect |
| 10. Do you cut the grass with an ax?          | N | <input type="checkbox"/> Correct | <input type="checkbox"/> Incorrect |

**39. BDAE: Complex Ideational Material:** \_\_\_\_/4

"I am going to read you a short story and then I will ask you some questions about it. Are you ready?" (normal rate)

"Mr. Jones had to go to Seattle. He decided to take the train. His wife drove him to the station, but on the way they had a flat tire. However, they arrived at the station just in time for him to catch the train."

|                                         |   |                                  |                                    |
|-----------------------------------------|---|----------------------------------|------------------------------------|
| 1. Did Mr. Jones miss his train?        | N | <input type="checkbox"/> Correct | <input type="checkbox"/> Incorrect |
| 2. Was Mr. Jones going to Seattle?      | Y | <input type="checkbox"/> Correct | <input type="checkbox"/> Incorrect |
| 3. Did he get to the station on time?   | Y | <input type="checkbox"/> Correct | <input type="checkbox"/> Incorrect |
| 4. Was he on his way home from Seattle? | N | <input type="checkbox"/> Correct | <input type="checkbox"/> Incorrect |

**Informed Consent (procedures adapted from Vansteensel et al., 2016)****40. Total score for 36-38: \_\_\_\_/20**

If score is  $\geq 19$ , continue to item 40. If score is  $\leq 18$ , participant may be decisionally impaired. Repeat any items on which the participant had one or more incorrect responses. Repeat all questions within any repeated item, and repeat each item only once. If the participant improves to  $\geq 19$  on the second administration, proceed to item 40. If not, participant is ineligible for the current study.

**41. Consent Form: Yes/No Questions: \_\_\_\_/10**

Read through consent form with participant before asking these questions. If a participant answers a question incorrectly, re-read the relevant section of the consent form and ask again.

|                                                              |   |                                  |                                    |
|--------------------------------------------------------------|---|----------------------------------|------------------------------------|
| 1. Will the study take 3 to 6 months to complete?            | Y | <input type="checkbox"/> Correct | <input type="checkbox"/> Incorrect |
| 2. Will you come to our office at OHSU?                      | N | <input type="checkbox"/> Correct | <input type="checkbox"/> Incorrect |
| 3. Does the study involve testing a new medication?          | N | <input type="checkbox"/> Correct | <input type="checkbox"/> Incorrect |
| 4. Does the study involve testing a new typing interface?    | Y | <input type="checkbox"/> Correct | <input type="checkbox"/> Incorrect |
| 5. Will you wear a headband to hold electrodes on your head? | Y | <input type="checkbox"/> Correct | <input type="checkbox"/> Incorrect |
| 6. Will each data collection session last 5 hours?           | N | <input type="checkbox"/> Correct | <input type="checkbox"/> Incorrect |
| 7. Is there a risk of mild discomfort or eye strain?         | Y | <input type="checkbox"/> Correct | <input type="checkbox"/> Incorrect |
| 8. Will we make your personal data available to the public?  | N | <input type="checkbox"/> Correct | <input type="checkbox"/> Incorrect |
| 9. Will you receive a \$1 gift card for each study visit?    | N | <input type="checkbox"/> Correct | <input type="checkbox"/> Incorrect |
| 10. Do you have the right to quit the study at any time?     | Y | <input type="checkbox"/> Correct | <input type="checkbox"/> Incorrect |

**Part III: Vision****42. Date:** \_\_\_\_/\_\_\_\_/\_\_\_\_  
MM DD YYYY**43. Researcher initials:** \_\_\_\_\_**44. Corrective lenses worn during screening:**

- ☐1 Glasses  
☐2 Contacts  
☐3 None

**Vision: Participant Report****45. Do you have trouble seeing up close?**

- ☐1 Yes  
☐2 No

**46. Do you have trouble seeing objects far away?**

- ☐1 Yes  
☐2 No

**47. Do you ever have double vision?**

- ☐1 Yes\*                      If \*: **43a. At near only?** ☐1 Yes    ☐2 No  
☐2 No                              **43b. With fatigue?** ☐1 Yes    ☐2 No  
☐3 Not sure\*                      **43c. All the time?** ☐1 Yes    ☐2 No

**43d. Does it improve with one eye closed?** ☐1 Yes    ☐2 No    ☐2 Not sure

**48. Do you experience headaches or other discomfort with near-vision tasks, like using a computer?**

- ☐1 Yes  
☐2 No  
☐3 Not sure

**49. Are you bothered by light?**

- ☐1 Yes  
☐2 No

**50. Are you bothered by glare?**

- ☐1 Yes  
☐2 No



**Vision: Fixation**

"I am going to ask you to start by looking at my nose, and then move your eyes to this target (show target) and hold your gaze there. After a few seconds I will have you look back at my nose, then at the target in another location. Look at my nose; look at the target....."

- Hold target approximately 8-10 inches from participant's face
- Using top of head, chin and either ear as reference points, start with target in center of participant's face, then move target in pattern of square.
- Participant to hold fixation on the target for at least 2 seconds. After 2 seconds, request they return their gaze to your nose and move target (eventually placing in top/bottom left/right fields).
- Note any signs of nystagmus, excessive blinking, or inability to hold fixation.

**51. Participant able to hold steady gaze on target for >2 seconds:** \_\_\_\_/4 trials

**52. Observations of:**

|                       |                                 |                               |                         |
|-----------------------|---------------------------------|-------------------------------|-------------------------|
| Nystagmus             | <input type="checkbox"/> 1 Yes  | <input type="checkbox"/> 2 No |                         |
| Excessive blinking    | <input type="checkbox"/> 1 Yes  | <input type="checkbox"/> 2 No |                         |
| Ptosis                | <input type="checkbox"/> 1 Yes  | <input type="checkbox"/> 2 No |                         |
| Movement restrictions | <input type="checkbox"/> 1 Yes* | <input type="checkbox"/> 2 No | If yes, describe: _____ |
| Other                 | <input type="checkbox"/> 1 Yes* | <input type="checkbox"/> 2 No | If yes, describe: _____ |

**Vision: Pursuits**

"Watch the target as it goes around and don't take your eyes off it."

- Hold target at eye level, 16 inches from participant's face.
- Move target slowly clockwise for two rotations and counter clockwise for two rotations.
- Observe ability to keep attention on target for all rotations and accuracy of ability to follow target with smooth, accurate movements.

**53. Ability:**

- ☐1 Cannot complete half rotation clock or counter clockwise
- ☐2 Completes half rotation in either direction
- ☐3 Completes one rotation in either direction but not 2 rotations
- ☐4 Completes 2 rotations in one direction but less than two in other
- ☐5 Completes 2 rotations in each direction

**54. Accuracy:**

- ☐1 No attempt to follow target
- ☐2 Refixates 5-10x
- ☐3 Refixates 3-4x
- ☐4 Refixates 2x or less
- ☐5 No refixations

**Vision: Saccades**

“Next I will show you two targets. When I say “red” please look at the red target, and when I say “green” look at the green target. Please hold your gaze until I ask you to switch.”

- Position two target objects at eye level, 16 inches from participant’s face; with each target approximately 4 inches away from midline (with total separation of 8 inches between objects).
- Provide instructions
- Complete 5 rounds, for a total of 10 fixations.
- Observe ability and accuracy of eye movements.

**55. Ability:**

- ☐1 Completes less than 2 round trips
- ☐2 Completes 2 round trips
- ☐3 Completes 3 round trips
- ☐4 Completes 4 round trips
- ☐5 Completes 5 round trips

**56. Accuracy:**

- ☐1 Large over or undershooting is noted 1 or more times.
- ☐2 Moderate over or undershooting is noted 1 or more times.
- ☐3 Constant slight over or under shooting >50% of the time.
- ☐4 Intermittent slight over or undershooting < 50% of the time.
- ☐5 No over or undershooting noted.

**Vision: Field of Vision**

“I’m going to cover one of your eyes. Look at my nose. Give me your ‘yes’ response when you see this target in your peripheral vision.”

- Slowly move target into one of four quadrants of visual field at a time.
- Repeat with other eye covered.

**57. Indicate + or – for detection of target in each quadrant:**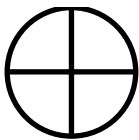

Right eye

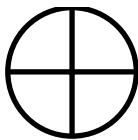

Left eye

**Vision: Distance Acuity****58. Distance acuity: 20/\_\_\_\_\_**Orientation:

- Participant to wear corrective lenses, if applicable.
- Position demo cards at eye level 8-10 inches apart in adequate lighting, approximately 20 inches from participant.
- Provide the following instructions: "Here are two cars. One has a broken wheel (point) and the other one has wheels that are okay (point)."
- Shuffle the two cards and have participant indicate the "broken" wheel, either using eye gaze or by giving a 'yes' signal when the examiner points to an option. Repeat 2-3 times to confirm understanding of instructions.

Test:

- Stand 10 feet from participant, ensuring adequate lighting on cards.
- Starting with 20/20 cards, repeat request to indicate which wheel is broken. Shuffle cards and repeat process four times.
- If 4/4 accuracy is not obtained, present additional cards in order of decreasing acuity (20/30, 20/60, etc.) until 4/4 accuracy is achieved.
- The best acuity rating at which participant achieves 4/4 accuracy should be recorded as the result.

**Vision: Near Acuity****59. Near acuity: 20/\_\_\_\_\_**Orientation:

- Participant to wear corrective lenses, if applicable.
- Position demo cards at eye level, 10 inches from participant, ensuring adequate lighting.
- As previously, provide following instructions: "Here are two cars. One has a broken wheel (point) and the other one has wheels that are okay (point)."
- Rotate wheel on card and have participant indicate the "broken" wheel, either using eye gaze or by giving a 'yes' signal when the examiner points to an option. Repeat 2-3 times to confirm understanding of instructions.

Test:

- Position demo cards at eye level, 45 inches from participant, ensuring adequate lighting.
- Repeat request to have participant indicate which card has broken wheel.
- Rotate wheel of card four times. If 4/4 accuracy (indicating 20/30 acuity) is not obtained, present card at 20 inches (indicating 20/68 acuity). If 4/4 accuracy not achieved, move cards approximately 5 inches closer until 4/4 accuracy is achieved. Use variable distance chart to determine acuity.

**Vision: Visual Perception**

Use flipbook and answer key for this section. Complete all 5 templates for each item. Administration instructions can be found in flipbook.

**59. Visual discrimination: \_\_\_\_/5**

|            |               |                                  |                                    |
|------------|---------------|----------------------------------|------------------------------------|
| Template 1 | Answer: _____ | <input type="checkbox"/> Correct | <input type="checkbox"/> Incorrect |
| Template 2 | Answer: _____ | <input type="checkbox"/> Correct | <input type="checkbox"/> Incorrect |
| Template 3 | Answer: _____ | <input type="checkbox"/> Correct | <input type="checkbox"/> Incorrect |
| Template 4 | Answer: _____ | <input type="checkbox"/> Correct | <input type="checkbox"/> Incorrect |
| Template 5 | Answer: _____ | <input type="checkbox"/> Correct | <input type="checkbox"/> Incorrect |

**60. Figure ground: \_\_\_\_/5**

|            |               |                                  |                                    |
|------------|---------------|----------------------------------|------------------------------------|
| Template 1 | Answer: _____ | <input type="checkbox"/> Correct | <input type="checkbox"/> Incorrect |
| Template 2 | Answer: _____ | <input type="checkbox"/> Correct | <input type="checkbox"/> Incorrect |
| Template 3 | Answer: _____ | <input type="checkbox"/> Correct | <input type="checkbox"/> Incorrect |
| Template 4 | Answer: _____ | <input type="checkbox"/> Correct | <input type="checkbox"/> Incorrect |
| Template 5 | Answer: _____ | <input type="checkbox"/> Correct | <input type="checkbox"/> Incorrect |

**61. Visual memory: \_\_\_\_/5**

|            |               |                                  |                                    |
|------------|---------------|----------------------------------|------------------------------------|
| Template 1 | Answer: _____ | <input type="checkbox"/> Correct | <input type="checkbox"/> Incorrect |
| Template 2 | Answer: _____ | <input type="checkbox"/> Correct | <input type="checkbox"/> Incorrect |
| Template 3 | Answer: _____ | <input type="checkbox"/> Correct | <input type="checkbox"/> Incorrect |
| Template 4 | Answer: _____ | <input type="checkbox"/> Correct | <input type="checkbox"/> Incorrect |
| Template 5 | Answer: _____ | <input type="checkbox"/> Correct | <input type="checkbox"/> Incorrect |

**Part IV: Pain, Medications, Motor Function, Cognition, & Literacy**

Use flipbook and answer key for most subtests in Part 4. Administration instructions can be found in flipbook. Provide feedback on sample items only to ensure participant understands instructions. Otherwise, provide no feedback.

62. Date: \_\_\_\_/\_\_\_\_/\_\_\_\_  
MM DD YYYY

63. Researcher initials: \_\_\_\_\_

**Pain****64. Do you have problems with pain?**

- ☐1 Yes\* If yes, continue with questions below (using visual analogues), selected from the PROMIS Pain Interference Bank. If no, skip to question 65.
- ☐2 No

**64a. In the past seven days, how difficult was it for you to take in or understand new information because of pain?**

- ☐1 Not at all  
☐2 A little bit  
☐3 Somewhat  
☐4 Quite a bit  
☐5 Very much

**64b. In the past seven days, how much did pain interfere with your ability to concentrate?**

- ☐1 Not at all  
☐2 A little bit  
☐3 Somewhat  
☐4 Quite a bit  
☐5 Very much

**64c. In the past seven days, how often was your pain so severe you could think of nothing else?**

- ☐1 Never  
☐2 Rarely  
☐3 Sometimes  
☐4 Often

- ☐5 Always

**64d. In the past seven days, how often did pain make you feel discouraged?**

- ☐1 Never  
☐2 Rarely  
☐3 Sometimes  
☐4 Often  
☐5 Always

**64e. In the past seven days, how much did pain interfere with your ability to remember things?**

- ☐1 Not at all  
☐2 A little bit  
☐3 Somewhat  
☐4 Quite a bit  
☐5 Very much

**Medications**

65. List participant's current medications (ALL): \_\_\_\_\_

**Motor function**

66. Briefly describe participant's motor function (voluntary motor abilities, involuntary movements, etc): \_\_\_\_\_

\_\_\_\_\_

\_\_\_\_\_

67. Note concerns and considerations regarding positioning for system trials: \_\_\_\_\_

\_\_\_\_\_

**Cognition: Trails**

68. Trails A: Level 1: ☐ Pass    ☐ Pass w/cues    ☐ Fail  
 Level 2: ☐ Pass    ☐ Pass w/cues    ☐ Fail    ☐ Did not attempt  
 Level 3: ☐ Pass    ☐ Pass w/cues    ☐ Fail    ☐ Did not attempt

Provide as many cues as necessary for participant to successfully complete sample item for levels 1 and 2. Stop the level 2 sample item after 6 digits. If participant requires cues to complete actual test items, record those cues below. If participant fails a level, even with cues, do not attempt the next level.

Cues might include:

1. Show and say current number, then ask "What comes next?"
2. Show and say current number, then show and say next number and ask participant to look at it.

Write box numbers for participant's responses in order, then check against answer key.

| Level | Responses |  |  |  |  |  | Cues provided (if applicable) |
|-------|-----------|--|--|--|--|--|-------------------------------|
| 1     |           |  |  |  |  |  |                               |
|       |           |  |  |  |  |  |                               |
| 2     |           |  |  |  |  |  |                               |
|       |           |  |  |  |  |  |                               |
|       |           |  |  |  |  |  |                               |
| 3     |           |  |  |  |  |  |                               |
|       |           |  |  |  |  |  |                               |
|       |           |  |  |  |  |  |                               |
|       |           |  |  |  |  |  |                               |

**69. Trails B:** **Level 1:** ☐ Pass ☐ Pass w/cues ☐ Fail  
**Level 2:** ☐ Pass ☐ Pass w/cues ☐ Fail ☐ Did not attempt

Provide as many cues as necessary for participant to successfully complete sample items. Stop the level 2 sample item after 6 digits/letters. If participant requires cues to complete actual test items, record those cues below. If participant fails a level, even with cues, do not attempt the next level.

Cues might include:

1. Show and say current number, then ask "What comes next?"
2. Show and say current number, then show and say next number and ask participant to look at it.

Write box numbers for participant's responses in order, then check against answer key.

| Level | Responses |  |  |  |  |  | Cues provided (if applicable) |
|-------|-----------|--|--|--|--|--|-------------------------------|
| 1     |           |  |  |  |  |  |                               |
|       |           |  |  |  |  |  |                               |
| 2     |           |  |  |  |  |  |                               |
|       |           |  |  |  |  |  |                               |

### Literacy

**70. Concept of print: Letter:** \_\_\_\_ correct/ \_\_\_\_ administered

**Word:** \_\_\_\_ correct/ \_\_\_\_ administered

**Sentence:** \_\_\_\_ correct/ \_\_\_\_ administered

Write box numbers for participant's responses, then check against answer key.

|            | Letter                                                                 | Word                                                                   | Sentence                                                               |
|------------|------------------------------------------------------------------------|------------------------------------------------------------------------|------------------------------------------------------------------------|
| Template 1 | A: ____ <input type="checkbox"/> Correct <input type="checkbox"/> Inc. | A: ____ <input type="checkbox"/> Correct <input type="checkbox"/> Inc. | A: ____ <input type="checkbox"/> Correct <input type="checkbox"/> Inc. |
| Template 2 | A: ____ <input type="checkbox"/> Correct <input type="checkbox"/> Inc. | A: ____ <input type="checkbox"/> Correct <input type="checkbox"/> Inc. | A: ____ <input type="checkbox"/> Correct <input type="checkbox"/> Inc. |
| Template 3 | A: ____ <input type="checkbox"/> Correct <input type="checkbox"/> Inc. | A: ____ <input type="checkbox"/> Correct <input type="checkbox"/> Inc. | A: ____ <input type="checkbox"/> Correct <input type="checkbox"/> Inc. |
| Template 4 | A: ____ <input type="checkbox"/> Correct <input type="checkbox"/> Inc. | A: ____ <input type="checkbox"/> Correct <input type="checkbox"/> Inc. | A: ____ <input type="checkbox"/> Correct <input type="checkbox"/> Inc. |
| Template 5 | A: ____ <input type="checkbox"/> Correct <input type="checkbox"/> Inc. | A: ____ <input type="checkbox"/> Correct <input type="checkbox"/> Inc. | A: ____ <input type="checkbox"/> Correct <input type="checkbox"/> Inc. |

**71. Letter identification:** \_\_\_\_ correct/\_\_\_\_ administered

Write box numbers for participant's responses, then check against answer key.

|            |                                                                                  |
|------------|----------------------------------------------------------------------------------|
| Template 1 | Answer: ____ <input type="checkbox"/> Correct <input type="checkbox"/> Incorrect |
| Template 2 | Answer: ____ <input type="checkbox"/> Correct <input type="checkbox"/> Incorrect |
| Template 3 | Answer: ____ <input type="checkbox"/> Correct <input type="checkbox"/> Incorrect |
| Template 4 | Answer: ____ <input type="checkbox"/> Correct <input type="checkbox"/> Incorrect |
| Template 5 | Answer: ____ <input type="checkbox"/> Correct <input type="checkbox"/> Incorrect |

**72. Copy-spelling:** \_\_\_\_ correct/\_\_\_\_ administered

Write box numbers for participant's responses in order, then check against answer key.

|            |  |  |  |                                                                     |
|------------|--|--|--|---------------------------------------------------------------------|
| Template 1 |  |  |  | <input type="checkbox"/> Correct <input type="checkbox"/> Incorrect |
| Template 2 |  |  |  | <input type="checkbox"/> Correct <input type="checkbox"/> Incorrect |
| Template 3 |  |  |  | <input type="checkbox"/> Correct <input type="checkbox"/> Incorrect |
| Template 4 |  |  |  | <input type="checkbox"/> Correct <input type="checkbox"/> Incorrect |
| Template 5 |  |  |  | <input type="checkbox"/> Correct <input type="checkbox"/> Incorrect |

**73. Error awareness:** \_\_\_\_ correct/\_\_\_\_ administered

Write box numbers for participant's responses, then check against answer key.

|            |                                                                                  |
|------------|----------------------------------------------------------------------------------|
| Template 1 | Answer: ____ <input type="checkbox"/> Correct <input type="checkbox"/> Incorrect |
| Template 2 | Answer: ____ <input type="checkbox"/> Correct <input type="checkbox"/> Incorrect |
| Template 3 | Answer: ____ <input type="checkbox"/> Correct <input type="checkbox"/> Incorrect |
| Template 4 | Answer: ____ <input type="checkbox"/> Correct <input type="checkbox"/> Incorrect |
| Template 5 | Answer: ____ <input type="checkbox"/> Correct <input type="checkbox"/> Incorrect |



**Reference List**

The OHSU BCI Sensory/Cognitive/Communication Screen, Revised includes items adapted from the following instruments:

- Boston Diagnostic Aphasia Examination: Goodglass H, Kaplan E, Barresi B. BDAE-3: Boston Diagnostic Aphasia Examination—Third Edition. Philadelphia, PA: Lippincott Williams & Wilkins; 2001.
- Broken Wheel Tests: Richman JE, Petito GT, Cron MT. Broken wheel acuity test: a new and valid test for preschool and exceptional children. Journal of the American Optometric Association. 1984 Aug;55(8):561-5.
- Coma Recovery Scale-Revised: Giacino JT, Kalmar K, Whyte J. The JFK Coma Recovery Scale-Revised: measurement characteristics and diagnostic utility. Archives of physical medicine and rehabilitation. 2004 Dec 1;85(12):2020-9.
- Motor-Free Visual Perception test: Colarusso RP, Hammill DD. Motor-Free Visual Perception Test. Academic Therapy Pub; 1972.
- NSUCO Oculomotor Test: Ficklin IT, Maples WC, Atchley J. Northeastern State University College of Optometry's Oculomotor Norms. J Behav Optom. 1992;3:143–150.
- PROMIS-Pain Interference Bank v1.0: Amtmann D, Cook KF, Jensen MP, Chen WH, Choi S, Revicki D, Cella D, Rothrock N, Keefe F, Callahan L, Lai JS. Development of a PROMIS item bank to measure pain interference. Pain. 2010 Jul 1;150(1):173-82.
- Rapid confrontation screening for peripheral visual field defects and extinction: Anderson AJ, Shuey NH, Wall M. Rapid confrontation screening for peripheral visual field defects and extinction. Clinical and experimental optometry. 2009 Jan;92(1):45-8.
- Trail Making Test: Bowie CR, Harvey PD. Administration and interpretation of the Trail Making Test. Nature protocols. 2006 Dec;1(5):2277.
- Western Aphasia Battery-Revised: Kertesz A. Western Aphasia Battery-Revised (WAB-R). PsychCorp. Harcourt Assessment Incorporation. 2006.

Procedures for obtaining informed consent are adapted from:

- Vansteensel MJ, Pels EG, Bleichner MG, Branco MP, Denison T, Freudenburg ZV, Gosselaar P, Leinders S, Ottens TH, Van Den Boom MA, Van Rijen PC. Fully implanted brain–computer interface in a locked-in patient with ALS. New England Journal of Medicine. 2016 Nov 24;375(21):2060-6.

**About This Instrument**

The OHSU BCI Sensory/Cognitive/Communication Screen, Revised was revised in June 2017 by Brandon Eddy, MA, CCC-SLP; Melanie Fried-Oken, PhD, CCC-SLP; Michelle Kinsella, OTR/L; Aimee Mooney, MS, CCC-SLP; and Betts Peters, MA, CCC-SLP; of the Oregon Health & Science University Institute on Development & Disability in Portland, Oregon, USA.

This work was supported by National Institutes of Health grant #2R01DC009834-06A1 and National Institute on Disability, Independent Living, and Rehabilitation Research grant #90RE5017.
